## CORRECTION

# Correction: Taming a 'fuzzy beast'? Stakeholder perspectives on Antarctic science-policy knowledge exchange practices in New Zealand

The *PLOS ONE* Staff

## Notice of republication

This article was republished on December 28, 2023, to correct some errors that were introduced during the typesetting process. The publisher apologizes for these errors. Please download this article again to view the correct version. The originally published, uncorrected article and the republished, corrected articles are provided here for reference.

## Supporting information

**S1 File. Originally published, uncorrected article.**

(PDF)

**S2 File. Republished, corrected article.**

(PDF)

## Reference

1. Gardiner NB, Gilbert N, Liggett D (2023) Taming a 'fuzzy beast'? Stakeholder perspectives on Antarctic science-policy knowledge exchange practices in New Zealand. *PLoS ONE* 18(11): e0294063. <https://doi.org/10.1371/journal.pone.0294063> PMID: 38011081

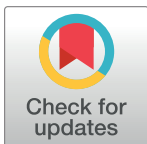

## OPEN ACCESS

**Citation:** The *PLOS ONE* Staff (2024) Correction: Taming a 'fuzzy beast'? Stakeholder perspectives on Antarctic science-policy knowledge exchange practices in New Zealand. *PLoS ONE* 19(1): e0297460. <https://doi.org/10.1371/journal.pone.0297460>

**Published:** January 17, 2024

**Copyright:** © 2024 The PLOS ONE Staff. This is an open access article distributed under the terms of the [Creative Commons Attribution License](https://creativecommons.org/licenses/by/4.0/), which permits unrestricted use, distribution, and reproduction in any medium, provided the original author and source are credited.
